# Supplementary material for: Chronic inflammation, neutrophil activity, and autoreactivity splits long COVID
Source: PubMed Central journal article supplement (PMC10349085; doi:10.1038/s41467-023-40012-7), 2023-07-14
Supplement: 41467_2023_40012_MOESM1_ESM.pdf [file 41467_2023_40012_MOESM1_ESM.pdf]

# Chronic inflammation, neutrophil activity, and autoreactivity splits Long COVID

First authors:

Matthew C. Woodruff ([mcwoodr@emory.edu](mailto:mcwoodr@emory.edu))

Kevin S. Bonham ([kbonham@wellesley.edu](mailto:kbonham@wellesley.edu))

Corresponding authors:

Matthew C. Woodruff ([mcwoodr@emory.edu](mailto:mcwoodr@emory.edu))

F. Eun-Hyung Lee ([F.E.Lee@emory.edu](mailto:F.E.Lee@emory.edu))

Ignacio Sanz ([Ignacio.sanz@emory.edu](mailto:Ignacio.sanz@emory.edu))

## **Supplemental Information**

Supplementary Figure 1 – Correlation matrix of proteomics data

Supplementary Figure 2 – Flow cytometry B cell gating strategy

Supplementary Figure 3 – Viral peptidome reactivity in CR vs PASC

Supplementary Table 1 – Antibody lists for spectral flow cytometry

## Supplementary figure 1

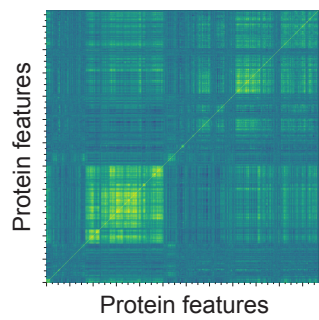

Supplementary Figure 1 – Correlation matrix of proteomics data  
NxN matrix of total protein features representing large blocks of correlation structure in the protein feature dataset

Supplementary Figure 2

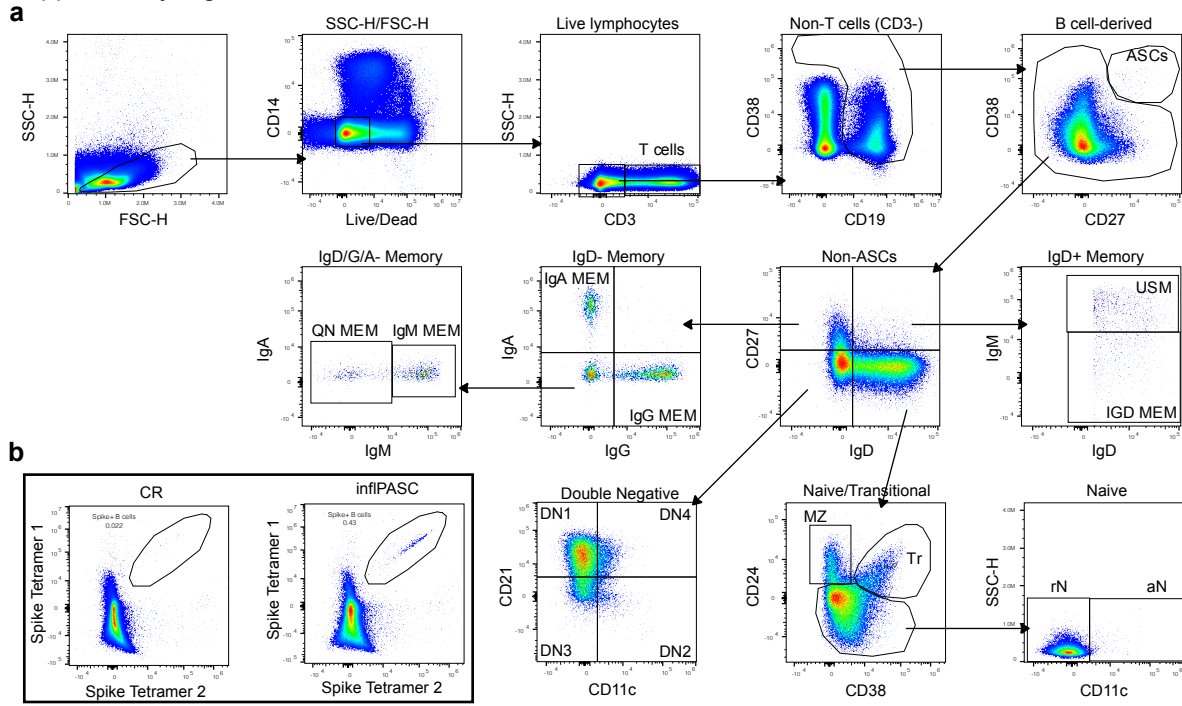

Supplementary Figure 2 – Flow cytometry B cell gating strategy  
 Flow cytometry gating strategy for B cell subpopulations identified in [Fig 4].

### Supplementary Figure 3

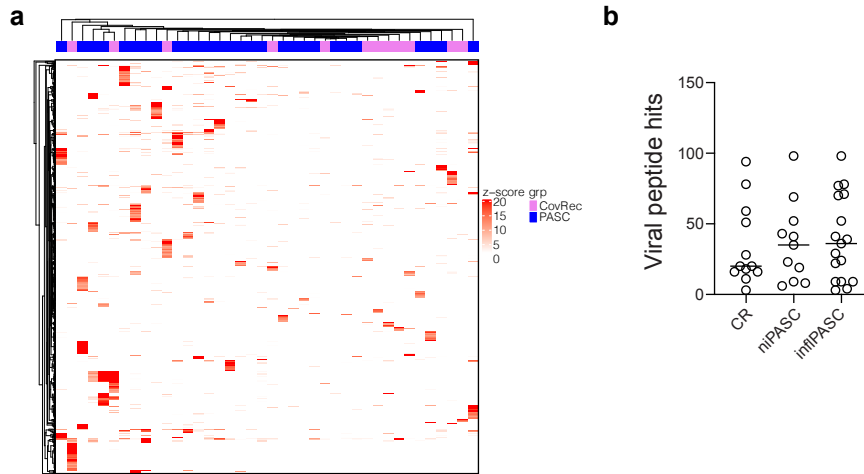

#### Supplementary Figure 3 – Viral peptidome reactivity in CR vs PASC

(a) Heatmap of reactivity against specific viral peptides across ~450 known human viral pathogens. PASC patients show slightly increased reactivity overall, but do not show common humoral targeting of any specific viral peptides (b) Overall anti-viral targeting of the viral peptidome in CR, niPASC, or infIPASC groups with medians displayed. All comparisons by One-way ANOVA are not significant.

Supplementary Table 1 – Antibody lists for spectral flow cytometry

| antibody     | conjugated      | clone      | company          | Cat #    | Dilution |
|--------------|-----------------|------------|------------------|----------|----------|
| CD14         | BUV 805         | M5E2       | BD               | 612902   | 1:400    |
| CD3          | PE Fire640      | SK7        | Biolegend        | 344860   | 1:400    |
| CD19         | BUV 563         | SJ25C1     | BD               | 612916   | 1:400    |
| CD20         | BV 650          | 2H7        | BD               | 563780   | 1:400    |
| CD4          | cFluorYG 584    | SK3        | Cytek            | R7-20042 | 1:400    |
| CD8          | Spark Blue 550  | SK1        | Biolegend        | 344760   | 1:400    |
| CD69         | BUV737          | FN50       | BD               | 612818   | 1:100    |
| PD-1         | BV 785          | EH12.2H7   | Biolegend        | 329930   | 1:150    |
| CD45RA       | BV 570          | HI100      | Biolegend        | 304132   | 1:200    |
| CCR7         | BUV496          | 2-L1-A     | BD               | 749827   | 1:200    |
| CD24         | BV 605          | ML5        | BD               | 562788   | 1:300    |
| CD38         | APC Fire810     | HIT2       | Biolegend        | 303550   | 1:300    |
| CD27         | BV750           | O323       | Biolegend        | 302850   | 1:200    |
| Cd11c        | APC Fire750     | 3.9        | Biolegend        | 301646   | 1:100    |
| CD21         | PE-Dazzle 594   | Bu32       | Biolegend        | 354922   | 1:300    |
| CXCR5        | BV750           | RF8B2      | BD               | 747111   | 1:300    |
| CXCR3        | BUV395          | 1C6/CXCR3  | BD               | 565223   | 1:80     |
| CCR6         | BV 480          | 11A9       | BD               | 566130   | 1:200    |
| CD138        | APC-R700        | MI15       | BD               | 566050   | 1:100    |
| HLA-DR       | BB 700          | G46-6      | BD               | 745782   | 1:500    |
| CD25         | PE Fire700      | M-A251     | Biolegend        | 356146   | 1:200    |
| CD127        | BV711           | HIL-7R-M21 | BD               | 563165   | 1:200    |
| IgM          | BV 510          | MHM-88     | Biolegend        | 314522   | 1:200    |
| IgD          | Pacific Blue    | IA6-2      | Biolegend        | 348224   | 1:200    |
| IgG          | PE Cy7          | G18-145    | BD               | 561298   | 1:100    |
| IgA          | FITC            | Polyclonal | Southern Biotech | 2052-02  | 1:200    |
| Streptavidin | PerCP           | n/a        | Biolegend        | 405213   |          |
| Streptavidin | BV 421          | n/a        | Biolegend        | 405225   |          |
| Streptavidin | PE              | n/a        | Biolegend        | 405204   |          |
| Streptavidin | Alexa Fluor 647 | n/a        | Biolegend        | 405237   |          |
| Live/Dead    | Zombie NIR      | n/a        | n/a              | 423106   | 1:500    |

Supplementary Table 1 – Antibody lists for spectral flow cytometry  
 A complete list of antibodies used for the spectral flow cytometry including clones, sources, catalogue numbers, and dilutions used.
