# Supplementary material for: Chronic inflammation, neutrophil activity, and autoreactivity splits long COVID
Source: PubMed Central journal article supplement (PMC10349085; doi:10.1038/s41467-023-40012-7), 2023-07-14
Supplement: 41467_2023_40012_MOESM3_ESM.pdf [file 41467_2023_40012_MOESM3_ESM.pdf]

## **Description of Additional Supplementary Files**

### **Supplementary Data 1: PASC vs uncomplicated recovery feature importance list**

Feature importance (potency) scores for all data features based on 10,000 RF classifications between PASC and CR patient groups (See methods).

### **Supplementary Data 2: Symptom distribution by PASC subtype classification**

PASC symptom presentations between niPASC and inflPASC groups. Subgroup analyses including only patients more than 90 DPSO (middle), or with mild/moderate initial illness (right) are provided. Symptoms with 2x changes between groups are represented in bold.
